# Supplementary material
Source: PubMed Central journal article supplement (PMC5331937)
Supplement: jnm180919SupplementaryData.pdf [file jnm180919SupplementaryData.pdf]

## Shape Descriptors

Sphericity =  $\frac{\sqrt[3]{36\pi V^2}}{S}$ , with  $V$  being the volume and  $S$  the surface.

Irregularity =  $\frac{\sum_{i=1}^6 i \times d(i)}{\sum_{i=1}^6 d(i)}$ , with  $d(i)$  being the number of voxels having  $i$  neighbor voxels in the surrounding background.

Major axis =  $\max(\text{distance}(p1, p2))$ , with  $p1$  and  $p2$  being two different voxels within the tumor.

3D surface = number of voxels spatially connected with the surrounding background.

## Histogram-Based (First-Order) Metrics

The histogram is a column vector  $h$  with each entry indexed by the gray level values and whose values are the number of voxels in the region of interest with that gray level value. Thus, gray level value  $i$  appears within the ROI  $h_i$  times.

Note: Materka (1) and others use the information-theoretic logarithm based 2 in the entropy calculations. We suggest the use of natural logarithm in all calculations.

Mean

$$\mu = \sum_{i=1}^{G_{max}} \{i \cdot h_i\}$$

Variance

$$\sigma^2 = \sum_{i=1}^{G_{max}} \{(i - \mu)^2 \cdot h_i\}$$

Skewness (Set to 0 when  $\sigma = 0$ .)

$$\mu^3 = \frac{1}{\sigma^3} \sum_{i=1}^{G_{max}} \{(i - \mu)^3 \cdot h_i\}$$

Excess kurtosis (Set to 0 when  $\sigma = 0$ . Note: "kurtosis" and "excess kurtosis" differ in that excess kurtosis = kurtosis – 3.)

$$\mu^4 = \frac{1}{\sigma^4} \sum_{i=1}^{G_{max}} \{(i - \mu)^4 \cdot h_i\} - 3$$

Energy

$$Ene = \sum_{i=1}^{G_{max}} \{[h_i]^2\}$$

Entropy<sub>HIST</sub> (Note: We will differentiate between the various entropy calculations in this document, specifying the distribution from which the entropy is computed.)

$$Ent = - \sum_{i=1}^{G_{max}} \{h_i \cdot \ln[h_i]\}$$

**Gray-Level-Cooccurrence Matrix, GLCM (Also Called Gray-Tone-Spatial-Dependence Matrix, GTSDM)**

Let  $p$  be the normalized (sum all of matrix entries is one) gray level cooccurrence matrix. (Note: Haralick (2) ambiguously states that  $Ng$  is the “number of distinct gray levels in the quantized image.” However, the equations indicated that  $Ng$  is not the number of distinct values present in the image but rather the maximum possible quantized value, called  $G_{max}$  in the following formulas.) For the metrics calculations we use the following:

$$p_x(i) = \sum_{j=1}^{G_{max}} \{p_{i,j}\} ; p_y(j) = \sum_{i=1}^{G_{max}} \{p_{i,j}\}$$

$$p_{x+y}(n) = \sum_{i+j=n} \{p_{i,j}\} ; n \in \{2,3 \dots, 2 \cdot G_{max}\}$$

$$p_{x-y}(n) = \sum_{|i-j|=n} \{p_{i,j}\} ; n \in \{0,1 \dots, G_{max} - 1\}$$

$$\mu_{x-y} = \sum_{n=0}^{G_{max}-1} \{n \cdot p_{x-y}(n)\}$$

Physics and Information theory dictates that  $0 \cdot \log(0) = 0$  for entropy calculations. This differs from Haralick (2), where an arbitrary  $\epsilon$  is recommended. GLCM metrics are no. 1 to 14, from Haralick (2).

Angular second moment (ASM) (This is called energy in Soh (3) and uniformity in Clausi (4).)

$$f_1 = \sum_{i=1}^{G_{max}} \left\{ \sum_{j=1}^{G_{max}} \{(p_{i,j})^2\} \right\}$$

Contrast<sub>GLCM</sub> (The first formula from Haralick (2) and the second version from Clausi (4) are equal to each other.)

$$f_2 = \sum_{n=0}^{G_{max}-1} \{n^2 \cdot p_{x-y}(n)\} = \sum_{i=1}^{G_{max}} \left\{ \sum_{j=1}^{G_{max}} \{(i-j)^2 \cdot p_{i,j}\} \right\}$$

Correlation (The first version corresponds to equations from Haralick (2) and Soh (3), which are equal to each other. The second one is from Clausi (4); the two are equivalent.)

$$f_3 = \frac{\sum_{i=1}^{G_{max}} \left\{ \sum_{j=1}^{G_{max}} \{i \cdot j \cdot p_{i,j}\} \right\} - \mu_x \cdot \mu_y}{\sigma_x \cdot \sigma_y} = \frac{\sum_{i=1}^{G_{max}} \left\{ \sum_{j=1}^{G_{max}} \{(i - \mu_x) \cdot (j - \mu_y) \cdot p_{i,j}\} \right\}}{\sigma_x \cdot \sigma_y}$$

$\mu_x$ ,  $\mu_y$ ,  $\sigma_x$ , and  $\sigma_y$  are only loosely hinted at in Haralick (2). Taking the means and variances of the  $p_x$  could be interpreted as taking the mean of the values of  $p_x$  as a set of numbers, rather than the distribution mean. This would be an incorrect interpretation, and computing the mean of the distribution is the correct interpretation. This is corroborated by Bharati (5). The following definitions are taken from Bharati (5):

$$\mu_x = \sum_{i=1}^{G_{max}} \left\{ i \cdot \sum_{j=1}^{G_{max}} \{p_{i,j}\} \right\}; \mu_y = \sum_{j=1}^{G_{max}} \left\{ j \cdot \sum_{i=1}^{G_{max}} \{p_{i,j}\} \right\}$$

$$\sigma_x = \left( \sum_{i=1}^{G_{max}} \left\{ (i - \mu_x)^2 \cdot \sum_{j=1}^{G_{max}} \{p_{i,j}\} \right\} \right)^{1/2}; \sigma_y = \left( \sum_{j=1}^{G_{max}} \left\{ (j - \mu_y)^2 \cdot \sum_{i=1}^{G_{max}} \{p_{i,j}\} \right\} \right)^{1/2}$$

Sum-of-squares variance (Ambiguous, as  $\mu$  was not defined.)

$$f_4 = \sum_{i=1}^{G_{max}} \left\{ \sum_{j=1}^{G_{max}} \{ (i - \mu)^2 \cdot p_{i,j} \} \right\}$$

We use the following definition for  $\mu$ :

$$\mu = \frac{\sum_{i=1}^{G_{max}} \left\{ \sum_{j=1}^{G_{max}} \{ p_{i,j} \} \right\}}{(G_{max})^2}$$

Inverse different moment (IDM) (is called homogeneity in Soh (3))

$$f_5 = \sum_{i=1}^{G_{max}} \left\{ \sum_{j=1}^{G_{max}} \left\{ \frac{1}{1 + (i - j)^2} \cdot p_{i,j} \right\} \right\}$$

Sum average (SAVE)

$$f_6 = \sum_{n=2}^{2 \cdot G_{max}} \{ n \cdot p_{x+y}(n) \}$$

Sum variance (SVAR) (The formula in Haralick (2) incorrectly uses  $f_8$ , an error that has propagated into many other papers and code implementations.)

$$f_7 = \sum_{n=2}^{2 \cdot G_{max}} \{ (n - f_6)^2 \cdot p_{x+y}(n) \}$$

GLCM sum entropy (SENT)

$$f_8 = - \sum_{n=2}^{2 \cdot G_{max}} \{ p_{x+y}(n) \cdot \ln[p_{x+y}(n)] \}$$

Entropy<sub>GLCM</sub>

$$f_9 = - \sum_{i=1}^{G_{max}} \left\{ \sum_{j=1}^{G_{max}} \{ p_{i,j} \cdot \ln[p_{i,j}] \} \right\}$$

Difference variance (DVAR) (The equation from the Murphy lab code was incorrect (mean was not subtracted) and is equal to Contrast<sub>GLCM</sub> ( $f_2$  above). This error has propagated into several code implementations.)

$$f_{10} = - \sum_{n=0}^{G_{max}-1} \left\{ (n - \mu_{x-y})^2 \cdot p_{x-y}(n) \right\}$$

GLCM difference entropy (DENT)

$$f_{11} = - \sum_{n=0}^{G_{max}-1} \left\{ p_{x-y}(n) \cdot \ln[p_{x-y}(n)] \right\}$$

Information Correlation (IC) (Set to infinity if the denominator is zero.)

$$f_{12} = \frac{f_9 - Ent_{xy,1}}{\max\{Ent_x; Ent_y\}}$$

Autocorrelation

$$f_{13} = \sum_{i=1}^{G_{max}} \left\{ \sum_{j=1}^{G_{max}} \{i \cdot j \cdot p_{i,j}\} \right\}$$

Dissimilarity

$$f_{14} = \sum_{i=1}^{G_{max}} \left\{ \sum_{j=1}^{G_{max}} \{|i - j| \cdot p_{i,j}\} \right\}$$

Cluster prominence (CP)

$$f_{15} = \sum_{i=1}^{G_{max}} \left\{ \sum_{j=1}^{G_{max}} \left\{ (i + j - \mu_x - \mu_y)^4 \cdot p_{i,j} \right\} \right\}$$

Maximum probability (MaxProba)

$$f_{16} = \max_{i,j} \{p_{i,j}\}$$

Inverse difference (ID) (Clausi (4))

$$f_{17} = \sum_{i=1}^{G_{max}} \left\{ \sum_{j=1}^{G_{max}} \left\{ \frac{1}{1 + |i - j|} \cdot p_{i,j} \right\} \right\}$$

### Neighborhood-Gray-Tone-Difference Matrix (NGTDM)

Let  $s$  be the NGTDM vector, indexed  $s_i$ , and  $p_i$  be the probability of a voxel value for voxels that are used in the computation of the NGTDM.  $N_g$  is the number of unique gray levels present in the image (not necessarily equal to the highest gray level value,  $G_{max}$ , since some values may not be present in the image). When a gray level is not present, the corresponding  $s_i$  is zero. (Note: no  $\epsilon$  is added to the coarseness or texture strength computation. Rather, if the denominator is zero, the value is set to infinity.) For contrast and complexity, the normalization factor  $n$  is meant to be the number of voxels that are used in the computation of the neighborhood difference matrix. For busyness, Amadasun (6) does not have the absolute value within the denominator. This would lead to a denominator that is always zero if implemented according to the equation given in Amadasun (6). Materka (1) shows the absolute value in the denominator in the busyness equation, a form that we recommend.

Coarseness

$$g_1 = \left[ \sum_{i=1}^{G_{max}} \{p_i \cdot s_i\} \right]^{-1}$$

Contrast<sub>NGTDM</sub> (Set to -1 if there is only a single gray level [no contrast can be computed].)

$$g_2 = \left[ \frac{1}{N_g \cdot (N_g - 1)} \cdot \sum_{i=1}^{G_{max}} \left\{ \sum_{j=1}^{G_{max}} \{p_i \cdot p_j \cdot (i - j)^2\} \right\} \right] \cdot \left[ \frac{1}{n} \cdot \sum_{i=1}^{G_{max}} \{s_i\} \right]$$

Busyness

$$g_3 = \frac{\sum_{i=1}^{G_{max}} \{p_i \cdot s_i\}}{\sum_{i=1}^{G_{max}} \left\{ \sum_{j=1}^{G_{max}} \{|i \cdot p_i - j \cdot p_j|\} \right\}} ; p_i \neq 0 ; p_j \neq 0$$

Complexity

$$g_4 = \sum_{i=1}^{G_{max}} \left\{ \sum_{j=1}^{G_{max}} \left\{ \frac{|i - j| \cdot (p_i \cdot s_i + p_j \cdot s_j)}{n \cdot (p_i + p_j)} \right\} \right\} ; p_i \neq 0 ; p_j \neq 0$$

Texture strength (TS)

$$g_5 = \frac{\sum_{i=1}^{G_{max}} \left\{ \sum_{j=1}^{G_{max}} \{(p_i + p_j) \cdot (i - j)^2\} \right\}}{\sum_{i=1}^{G_{max}} \{s_i\}} ; p_i \neq 0 ; p_j \neq 0$$

### Gray-Level-Zone-Size Matrix (GLZSM)

Let  $p$  be the gray-level-zone-size matrix (GLZSM) indexed by  $p_{i,j}$  with rows  $i$  indicating gray levels and columns  $j$  indicating zone sizes. The largest zone size (the number of columns) will be denoted  $S_{max}$ . The total number of unique connected zones is  $n_z$ . The total number of voxels is  $n_v$ . The following metrics are taken from Tang (7).

Small-zone-size emphasis (SZSE)

$$Z_1 = \frac{1}{n_z} \cdot \sum_{i=1}^{G_{max}} \left\{ \sum_{j=1}^{S_{max}} \left\{ \frac{p_{i,j}}{j^2} \right\} \right\}$$

Large-zone-size emphasis (LZSE)

$$Z_2 = \frac{1}{n_z} \cdot \sum_{i=1}^{G_{max}} \left\{ \sum_{j=1}^{S_{max}} \{p_{i,j} \cdot j^2\} \right\}$$

Low-gray-level-zone emphasis (LGLZE)

$$Z_3 = \frac{1}{n_z} \cdot \sum_{i=1}^{G_{max}} \left\{ \sum_{j=1}^{S_{max}} \left\{ \frac{p_{i,j}}{i^2} \right\} \right\}$$

High-gray-level-zone emphasis (HGLZE)

$$Z_4 = \frac{1}{n_z} \cdot \sum_{i=1}^{G_{max}} \left\{ \sum_{j=1}^{S_{max}} \{p_{i,j} \cdot i^2\} \right\}$$

Small-zone/low-gray emphasis (SZLGE)

$$Z_5 = \frac{1}{n_z} \cdot \sum_{i=1}^{G_{max}} \left\{ \sum_{j=1}^{S_{max}} \left\{ \frac{p_{i,j}}{i^2 \cdot j^2} \right\} \right\}$$

Small-zone/high-gray emphasis (SZHGE)

$$Z_6 = \frac{1}{n_z} \cdot \sum_{i=1}^{G_{max}} \left\{ \sum_{j=1}^{S_{max}} \left\{ \frac{p_{i,j} \cdot i^2}{j^2} \right\} \right\}$$

Large-zone/low-gray emphasis (LZLGE)

$$Z_7 = \frac{1}{n_z} \cdot \sum_{i=1}^{G_{max}} \left\{ \sum_{j=1}^{S_{max}} \left\{ \frac{p_{i,j} \cdot j^2}{i^2} \right\} \right\}$$

Large-zone/high-gray emphasis (LZHGE)

$$Z_8 = \frac{1}{n_z} \cdot \sum_{i=1}^{G_{max}} \left\{ \sum_{j=1}^{S_{max}} \{p_{i,j} \cdot i^2 \cdot j^2\} \right\}$$

Gray-level nonuniformity (GLNU)

$$Z_9 = \frac{1}{n_z} \cdot \sum_{i=1}^{G_{max}} \left\{ \left[ \sum_{j=1}^{S_{max}} \{p_{i,j}\} \right]^2 \right\}$$

Zone-size nonuniformity (ZSNU)

$$Z_{10} = \frac{1}{n_z} \cdot \sum_{j=1}^{S_{max}} \left\{ \left[ \sum_{i=1}^{G_{max}} \{p_{i,j}\} \right]^2 \right\}$$

Zone-size percentage (SZP)

$$Z_{11} = \frac{n_z}{n_v}$$

SUPPLEMENTAL TABLE 1: Test-Retest Repeatability of Features Computed on FDG PET Component

| Feature                                         | Quantization |       | Bland-Altman analysis |        |         |         | ICC   |
|-------------------------------------------------|--------------|-------|-----------------------|--------|---------|---------|-------|
|                                                 | Method       | Value | Mean (%)              | SD (%) | LRL (%) | URL (%) |       |
| <b>Volume</b>                                   |              |       |                       |        |         |         |       |
| MAV                                             | N/A          |       | -1.4                  | 11.1   | -23.2   | 20.3    | 0.997 |
| <b>Shape descriptors</b>                        |              |       |                       |        |         |         |       |
| Sphericity                                      | N/A          |       | 1.1                   | 4.8    | -8.3    | 10.5    | 0.969 |
| Irregularity                                    |              |       | -0.5                  | 4.8    | -9.9    | 8.9     | 0.848 |
| 3D Surface                                      |              |       | -2.1                  | 9      | -19.6   | 15.5    | 0.994 |
| Major axis                                      |              |       | -0.6                  | 8.4    | -17     | 15.9    | 0.993 |
| <b>1<sup>st</sup> order (histogram) metrics</b> |              |       |                       |        |         |         |       |
| Maximum                                         | N/A          |       | 3.5                   | 19.3   | -34.3   | 41.3    | 0.964 |
| Mean                                            |              |       | 3.0                   | 17.0   | -30.4   | 36.3    | 0.97  |
| Standard deviation (SD)                         |              |       | 3.8                   | 21.5   | -38.4   | 46.1    | 0.961 |
| Skewness                                        |              |       | -1.1                  | 33.7   | -67.1   | 64.9    | 0.865 |
| Kurtosis                                        |              |       | 0.8                   | 19.1   | -36.8   | 38.3    | 0.940 |
| Energy                                          |              |       | -1.2                  | 23.8   | -47.9   | 45.5    | 0.973 |
| Entropy <sub>HIST</sub>                         |              |       | 0.1                   | 4.0    | -7.9    | 8.0     | 0.991 |
| CH <sub>AUC</sub>                               |              |       | -0.2                  | 3.6    | -7.3    | 6.9     | 0.812 |
| <b>2<sup>nd</sup> order metrics</b>             |              |       |                       |        |         |         |       |
| <b>GLCM</b>                                     |              |       |                       |        |         |         |       |
| ASM                                             | B            | 8     | 1.2                   | 23.3   | -44.4   | 46.7    | 0.934 |
|                                                 |              | 16    | 1.1                   | 20.7   | -39.5   | 41.6    | 0.945 |
|                                                 |              | 32    | 1                     | 21.7   | -41.5   | 43.6    | 0.832 |
|                                                 |              | 64    | -0.5                  | 18.6   | -37     | 36.1    | 0.949 |
|                                                 |              | 128   | -0.8                  | 19     | -38.1   | 36.5    | 0.958 |
|                                                 | W            | 0.5   | -11.3                 | 41.8   | -93.3   | 70.7    | 0.904 |
| IDM                                             | B            | 8     | 0.5                   | 7.3    | -13.8   | 14.9    | 0.973 |
|                                                 |              | 16    | 0                     | 9.4    | -18.5   | 18.5    | 0.973 |
|                                                 |              | 32    | 0                     | 11.5   | -22.6   | 22.6    | 0.97  |
|                                                 |              | 64    | -0.8                  | 16.8   | -33.8   | 32.2    | 0.958 |
|                                                 |              | 128   | -2.1                  | 23.5   | -48.1   | 44      | 0.935 |
|                                                 | W            | 0.5   | -5.0                  | 16.4   | -37.1   | 27.1    | 0.964 |
| Entropy <sub>GLCM</sub>                         | B            | 8     | -0.8                  | 7.5    | -15.4   | 13.8    | 0.911 |
|                                                 |              | 16    | -0.4                  | 4.1    | -8.4    | 7.7     | 0.941 |
|                                                 |              | 32    | -0.3                  | 3.6    | -7.4    | 6.8     | 0.955 |
|                                                 |              | 64    | -0.1                  | 2.6    | -5.1    | 4.9     | 0.984 |
|                                                 |              | 128   | 0                     | 2.5    | -4.9    | 4.8     | 0.992 |
|                                                 | W            | 0.5   | 5.7                   | 22.6   | -38.7   | 50.1    | 0.969 |
| Correlation                                     | B            | 8     | 2.9                   | 104.6  | -202    | 207.9   | 0.978 |

|                          |      |     |      |       |        |        |       |       |
|--------------------------|------|-----|------|-------|--------|--------|-------|-------|
|                          |      | 16  | 2.4  | 115.6 | -224.2 | 229.1  | 0.977 |       |
|                          |      | 32  | 0.3  | 115.9 | -226.9 | 227.6  | 0.978 |       |
|                          |      | 64  | 0.7  | 114.4 | -223.5 | 225    | 0.977 |       |
|                          |      | 128 | 0.6  | 112.1 | -219   | 220.3  | 0.977 |       |
|                          |      | W   | 0.5  | 7.6   | 107.1  | -202.3 | 217.5 | 0.969 |
|                          |      | ID  | B    | 8     | 0.5    | 5.4    | -10   | 10.9  |
| 16                       | 0    |     |      | 6.4   | -12.5  | 12.5   | 0.973 |       |
| 32                       | 0.1  |     |      | 7.2   | -14    | 14.2   | 0.973 |       |
| 64                       | -0.4 |     |      | 9.3   | -18.7  | 18     | 0.968 |       |
| 128                      | -0.8 |     |      | 11.3  | -23    | 21.3   | 0.964 |       |
| W                        | 0.5  |     | -3.6 | 11.9  | -27.0  | 19.8   | 0.964 |       |
| Dissimilarity            | B    | 8   | -0.6 | 10.4  | -21.1  | 19.9   | 0.971 |       |
|                          |      | 16  | -0.3 | 10.2  | -20.2  | 19.6   | 0.97  |       |
|                          |      | 32  | -0.4 | 9.9   | -19.9  | 19.1   | 0.972 |       |
|                          |      | 64  | -0.3 | 9.8   | -19.6  | 19     | 0.972 |       |
|                          |      | 128 | -0.3 | 9.9   | -19.6  | 19     | 0.972 |       |
|                          | W    | 0.5 | 10.0 | 31.7  | -52.1  | 72.1   | 0.974 |       |
| Contrast <sub>GLCM</sub> | B    | 8   | -0.8 | 17.6  | -35.3  | 33.8   | 0.967 |       |
|                          |      | 16  | -0.6 | 18.3  | -36.4  | 35.1   | 0.963 |       |
|                          |      | 32  | -0.7 | 18.2  | -36.4  | 35.1   | 0.964 |       |
|                          |      | 64  | -0.7 | 18.1  | -36.2  | 34.9   | 0.965 |       |
|                          |      | 128 | -0.6 | 18.2  | -36.2  | 35     | 0.964 |       |
|                          | W    | 0.5 | 14.9 | 47.4  | -77.9  | 107.7  | 0.982 |       |
| SOSV                     | B    | 8   | -0.2 | 16.5  | -32.6  | 32.2   | 0.914 |       |
|                          |      | 16  | -0.3 | 17.9  | -35.3  | 34.8   | 0.910 |       |
|                          |      | 32  | -0.5 | 18.8  | -37.2  | 36.3   | 0.905 |       |
|                          |      | 64  | -0.4 | 18.9  | -37.5  | 36.6   | 0.907 |       |
|                          |      | 128 | 0.1  | 1.8   | -3.5   | 3.7    | 0.575 |       |
|                          | W    | 0.5 | 11.4 | 39.1  | -65.3  | 88.1   | 0.994 |       |
| SAVE                     | B    | 8   | 0.1  | 9.1   | -17.7  | 17.8   | 0.923 |       |
|                          |      | 16  | 0    | 10.2  | -19.9  | 19.9   | 0.921 |       |
|                          |      | 32  | -0.1 | 10.9  | -21.5  | 21.3   | 0.917 |       |
|                          |      | 64  | -0.1 | 11.1  | -21.8  | 21.6   | 0.919 |       |
|                          |      | 128 | -0.5 | 19.1  | -37.9  | 37     | 0.906 |       |
|                          | W    | 0.5 | 5.2  | 19.3  | -32.7  | 43.1   | 0.984 |       |
| SVAR                     | B    | 8   | -1.4 | 15.5  | -31.9  | 29.1   | 0.899 |       |
|                          |      | 16  | -1.3 | 15.9  | -32.5  | 29.9   | 0.892 |       |
|                          |      | 32  | -1.3 | 16    | -32.6  | 30     | 0.89  |       |
|                          |      | 64  | -1.3 | 15.9  | -32.4  | 29.8   | 0.892 |       |
|                          |      | 128 | -0.1 | 11.2  | -22.2  | 21.9   | 0.918 |       |
|                          | W    | 0.5 | 12.5 | 46.6  | -78.9  | 103.9  | 0.988 |       |
| SENT                     | B    | 8   | -0.7 | 6.1   | -12.8  | 11.3   | 0.884 |       |
|                          |      | 16  | -0.4 | 3.8   | -7.9   | 7.1    | 0.910 |       |



|                 |   |     |       |       |        |       |       |
|-----------------|---|-----|-------|-------|--------|-------|-------|
|                 |   | 32  | -0.4  | 3.5   | -7.3   | 6.5   | 0.905 |
|                 |   | 64  | -0.2  | 2.1   | -4.4   | 4     | 0.959 |
|                 |   | 128 | -1.3  | 15.9  | -32.5  | 30    | 0.890 |
|                 | W | 0.5 | 4.3   | 19.5  | -33.8  | 42.4  | 0.972 |
| DVAR            | B | 8   | -0.2  | 14.8  | -29.2  | 28.8  | 0.970 |
|                 |   | 16  | -0.6  | 16.1  | -32.2  | 31    | 0.966 |
|                 |   | 32  | -0.6  | 16.7  | -33.3  | 32.2  | 0.963 |
|                 |   | 64  | -0.7  | 16.7  | -33.3  | 32    | 0.963 |
|                 |   | 128 | -0.2  | 2.2   | -4.5   | 4.1   | 0.965 |
|                 | W | 0.5 | 11.7  | 42.5  | -71.7  | 95.1  | 0.983 |
| DENT            | B | 8   | -0.6  | 6.8   | -13.9  | 12.8  | 0.941 |
|                 |   | 16  | -0.3  | 4.5   | -9.2   | 8.5   | 0.961 |
|                 |   | 32  | -0.3  | 4.1   | -8.4   | 7.8   | 0.949 |
|                 |   | 64  | -0.2  | 3.0   | -6.1   | 5.7   | 0.961 |
|                 |   | 128 | -0.6  | 16.7  | -33.4  | 32.2  | 0.963 |
|                 | W | 0.5 | 4.3   | 17.6  | -30.2  | 38.9  | 0.970 |
| IC              | B | 8   | 0.5   | 29.7  | -57.7  | 58.6  | 0.981 |
|                 |   | 16  | 0.5   | 22.5  | -43.5  | 44.6  | 0.961 |
|                 |   | 32  | -0.6  | 15.3  | -30.6  | 29.3  | 0.945 |
|                 |   | 64  | -1    | 13.3  | -27.1  | 25    | 0.960 |
|                 |   | 128 | -0.2  | 2.6   | -5.3   | 4.9   | 0.957 |
|                 | W | 0.5 | -1.0  | 32.0  | -63.6  | 61.7  | 0.944 |
| Autocorrelation | B | 8   | 0     | 17.9  | -35    | 35    | 0.900 |
|                 |   | 16  | -0.2  | 19.8  | -39.1  | 38.7  | 0.895 |
|                 |   | 32  | -0.4  | 21.1  | -41.8  | 41    | 0.890 |
|                 |   | 64  | -0.4  | 21.4  | -42.3  | 41.6  | 0.892 |
|                 |   | 128 | 0     | 0.0   | 0      | 0     | 0.834 |
|                 | W | 0.5 | 9.8   | 37.2  | -63.0  | 82.7  | 0.995 |
| Prominence      | B | 8   | -2.5  | 23.9  | -49.4  | 44.5  | 0.853 |
|                 |   | 16  | -2.3  | 25.4  | -52.2  | 47.5  | 0.835 |
|                 |   | 32  | -2.2  | 26.1  | -53.4  | 48.9  | 0.823 |
|                 |   | 64  | -2.4  | 26    | -53.3  | 48.6  | 0.826 |
|                 |   | 128 | -30.8 | 225.5 | -472.8 | 411.1 | 0.875 |
|                 | W | 0.5 | 19.0  | 74.5  | -127.0 | 165.1 | 0.993 |
| MaxProba        | B | 8   | -0.2  | 27    | -53.1  | 52.8  | 0.956 |
|                 |   | 16  | 1.5   | 30.9  | -59    | 62.1  | 0.924 |
|                 |   | 32  | 2.5   | 34.2  | -64.5  | 69.5  | 0.833 |
|                 |   | 64  | -2.1  | 34.3  | -69.4  | 65.2  | 0.933 |
|                 |   | 128 | -2.2  | 26.1  | -53.4  | 48.9  | 0.824 |
|                 | W | 0.5 | -7.3  | 35.5  | -76.9  | 62.3  | 0.946 |
| <b>NGTDM</b>    |   |     |       |       |        |       |       |
| Coarseness      | B | 8   | 0.9   | 16    | -30.4  | 32.2  | 0.964 |
|                 |   | 16  | 1     | 14.5  | -27.3  | 29.3  | 0.977 |

|                                     |                           |     |       |      |        |       |       |       |
|-------------------------------------|---------------------------|-----|-------|------|--------|-------|-------|-------|
|                                     |                           | 32  | 0.8   | 15   | -28.6  | 30.2  | 0.969 |       |
|                                     |                           | 64  | 1.4   | 14.3 | -26.6  | 29.4  | 0.968 |       |
|                                     |                           | 128 | -5.6  | 40.9 | -85.7  | 74.5  | 0.851 |       |
|                                     | W                         | 0.5 | -0.6  | 37.7 | -74.4  | 73.2  | 0.841 |       |
|                                     | Contrast <sub>NGTDM</sub> | B   | 8     | -0.2 | 29.6   | -58.2 | 57.8  | 0.649 |
|                                     |                           |     | 16    | 1.1  | 25.2   | -48.2 | 50.4  | 0.883 |
| 32                                  |                           |     | 0.3   | 26.3 | -51.2  | 51.9  | 0.927 |       |
| 64                                  |                           |     | 0.6   | 27.6 | -53.5  | 54.7  | 0.985 |       |
| 128                                 |                           |     | 2.4   | 13.4 | -23.9  | 28.7  | 0.970 |       |
| W                                   |                           | 0.5 | 15.4  | 45.7 | -74.2  | 105.1 | 0.669 |       |
| Busyness                            | B                         | 8   | -4.7  | 22.2 | -48.2  | 38.8  | 0.994 |       |
|                                     |                           | 16  | -2.5  | 18.6 | -38.9  | 33.9  | 0.993 |       |
|                                     |                           | 32  | -1.3  | 17.5 | -35.6  | 33    | 0.993 |       |
|                                     |                           | 64  | -1.9  | 15   | -31.3  | 27.6  | 0.992 |       |
|                                     |                           | 128 | -0.8  | 29   | -57.7  | 56.1  | 0.990 |       |
|                                     | W                         | 0.5 | -9.6  | 55.5 | -118.4 | 99.3  | 0.361 |       |
| Complexity                          | B                         | 8   | -0.2  | 14.7 | -28.9  | 28.5  | 0.880 |       |
|                                     |                           | 16  | -0.1  | 15.5 | -30.4  | 30.3  | 0.948 |       |
|                                     |                           | 32  | 0.3   | 16.1 | -31.3  | 31.9  | 0.962 |       |
|                                     |                           | 64  | -0.3  | 16.5 | -32.6  | 32    | 0.981 |       |
|                                     |                           | 128 | -2.6  | 13.1 | -28.3  | 23.1  | 0.993 |       |
|                                     | W                         | 0.5 | 10.7  | 39.6 | -66.9  | 88.3  | 0.924 |       |
| TS                                  | B                         | 8   | -1.4  | 14.7 | -30.2  | 27.3  | 0.993 |       |
|                                     |                           | 16  | -1.4  | 14.6 | -29.9  | 27.1  | 0.993 |       |
|                                     |                           | 32  | -1.3  | 14.6 | -30    | 27.3  | 0.992 |       |
|                                     |                           | 64  | -1.3  | 14.6 | -29.8  | 27.2  | 0.992 |       |
|                                     |                           | 128 | -1.1  | 17   | -34.5  | 32.3  | 0.982 |       |
|                                     | W                         | 0.5 | 6.6   | 29.6 | -51.5  | 64.7  | 0.996 |       |
| <b>3<sup>rd</sup> order metrics</b> |                           |     |       |      |        |       |       |       |
| <b>GLZSM</b>                        |                           |     |       |      |        |       |       |       |
| SZSE                                | B                         | 8   | 1.6   | 12.9 | -23.6  | 26.8  | 0.665 |       |
|                                     |                           | 16  | 0.6   | 5.9  | -11    | 12.1  | 0.836 |       |
|                                     |                           | 32  | 0.3   | 3.6  | -6.8   | 7.4   | 0.861 |       |
|                                     |                           | 64  | 0.2   | 2.8  | -5.3   | 5.7   | 0.746 |       |
|                                     |                           | 128 | 0     | 2    | -3.8   | 3.9   | 0.622 |       |
|                                     | W                         | 0.5 | -2.6  | 37.7 | -76.6  | 71.3  | 0.910 |       |
| LZSE                                | B                         | 8   | 1.7   | 53.6 | -103.4 | 106.8 | 0.961 |       |
|                                     |                           | 16  | 2.8   | 38.1 | -71.9  | 77.5  | 0.416 |       |
|                                     |                           | 32  | -0.7  | 21.7 | -43.2  | 41.7  | 0.791 |       |
|                                     |                           | 64  | -0.8  | 11.1 | -22.6  | 21    | 0.878 |       |
|                                     |                           | 128 | -0.3  | 7.4  | -14.8  | 14.2  | 0.765 |       |
|                                     | W                         | 0.5 | -14.6 | 63.2 | -138.5 | 109.3 | 0.943 |       |
| ZSNU                                | B                         | 8   | -1.3  | 23.2 | -46.8  | 44.1  | 0.980 |       |

|       |     |      |      |        |        |       |       |
|-------|-----|------|------|--------|--------|-------|-------|
|       |     | 16   | -1   | 16.8   | -33.9  | 31.8  | 0.992 |
|       |     | 32   | -0.3 | 15.3   | -30.4  | 29.7  | 0.991 |
|       |     | 64   | -1.1 | 13.7   | -28    | 25.8  | 0.995 |
|       |     | 128  | -2.4 | 13.3   | -28.5  | 23.6  | 0.995 |
|       |     | W    | 0.5  | 2.1    | 29.3   | -55.3 | 59.5  |
| GLNU  | B   | 8    | 1.1  | 38     | -73.4  | 75.6  | 0.933 |
|       |     | 16   | 0.2  | 23.3   | -45.5  | 46    | 0.982 |
|       |     | 32   | -0.2 | 16.5   | -32.5  | 32    | 0.993 |
|       |     | 64   | -0.4 | 13.6   | -27.1  | 26.3  | 0.996 |
|       |     | 128  | -1.1 | 13.9   | -28.3  | 26.1  | 0.998 |
| W     | 0.5 | 9.2  | 46.8 | -82.5  | 100.9  | 0.991 |       |
| ZSP   | B   | 8    | -0.1 | 20.1   | -39.5  | 39.3  | 0.951 |
|       |     | 16   | 0.4  | 9.4    | -18.1  | 18.8  | 0.954 |
|       |     | 32   | 0.3  | 5.7    | -11    | 11.6  | 0.920 |
|       |     | 64   | 0.3  | 3.6    | -6.8   | 7.4   | 0.839 |
|       |     | 128  | 0.1  | 2.5    | -4.9   | 5.1   | 0.693 |
| W     | 0.5 | 6.5  | 33.3 | -58.7  | 71.8   | 0.945 |       |
| LGLZE | B   | 8    | -0.8 | 14.3   | -28.9  | 27.2  | 0.709 |
|       |     | 16   | 1.4  | 20.7   | -39.2  | 42    | 0.763 |
|       |     | 32   | 1.7  | 34.4   | -65.8  | 69.2  | 0.733 |
|       |     | 64   | 3.6  | 44.9   | -84.5  | 91.6  | 0.669 |
|       |     | 128  | 3.9  | 51.7   | -97.3  | 105.2 | 0.684 |
| W     | 0.5 | -1.7 | 27.4 | -55.4  | 52.1   | 0.954 |       |
| HGLZE | B   | 8    | -0.6 | 16.4   | -32.8  | 31.5  | 0.793 |
|       |     | 16   | 0.2  | 17.8   | -34.6  | 35    | 0.841 |
|       |     | 32   | 0.1  | 19     | -37.2  | 37.4  | 0.874 |
|       |     | 64   | -0.4 | 19.4   | -38.3  | 37.6  | 0.884 |
|       |     | 128  | -0.1 | 20     | -39.3  | 39.2  | 0.885 |
| W     | 0.5 | 7.4  | 39.4 | -69.8  | 84.6   | 0.993 |       |
| SZLGE | B   | 8    | 0    | 22.6   | -44.3  | 44.3  | 0.379 |
|       |     | 16   | 3.8  | 26.1   | -47.5  | 55    | 0.602 |
|       |     | 32   | 3    | 36.7   | -68.9  | 74.9  | 0.599 |
|       |     | 64   | 4.6  | 48.6   | -90.7  | 99.8  | 0.428 |
|       |     | 128  | 4.1  | 56.2   | -106.1 | 114.3 | 0.392 |
| W     | 0.5 | -3.1 | 47.7 | -96.6  | 90.4   | 0.670 |       |
| SZHGE | B   | 8    | 1    | 22.1   | -42.2  | 44.3  | 0.863 |
|       |     | 16   | 1    | 19.9   | -38.1  | 40.1  | 0.859 |
|       |     | 32   | 0.6  | 19.8   | -38.3  | 39.5  | 0.876 |
|       |     | 64   | -0.3 | 19.5   | -38.6  | 37.9  | 0.887 |
|       |     | 128  | 0    | 20.2   | -39.6  | 39.6  | 0.886 |
| W     | 0.5 | 3.6  | 63.7 | -121.2 | 128.4  | 0.993 |       |
| LZLGE | B   | 8    | -1.1 | 66.5   | -131.4 | 129.2 | 0.957 |
|       |     | 16   | 1.2  | 58.5   | -113.5 | 115.9 | 0.347 |

|     |       |     |       |      |        |       |       |
|-----|-------|-----|-------|------|--------|-------|-------|
|     |       | 32  | 0.9   | 53.2 | -103.5 | 105.3 | 0.544 |
|     |       | 64  | 1.7   | 51.8 | -99.8  | 103.3 | 0.744 |
|     |       | 128 | 5.8   | 54.2 | -100.5 | 112   | 0.785 |
|     | W     | 0.5 | -18.7 | 76.4 | -168.5 | 131.1 | 0.945 |
|     | LZHGE | B   | 8     | 4.4  | 46.4   | -86.6 | 95.3  |
| 16  |       |     | 2.5   | 32   | -60.1  | 65.1  | 0.969 |
| 32  |       |     | -1    | 22.8 | -45.7  | 43.6  | 0.940 |
| 64  |       |     | -0.5  | 22.4 | -44.4  | 43.4  | 0.861 |
| 128 |       |     | -0.5  | 20.5 | -40.7  | 39.7  | 0.863 |
| W   |       | 0.5 | -3.0  | 53.7 | -108.3 | 102.3 | 0.931 |

SUPPLEMENTAL TABLE 2: Test–Retest Repeatability of Features Computed on Low-Dose CT Component

| Feature                                         | Quantization |       | Bland-Altman analysis |        |         |         | ICC   |
|-------------------------------------------------|--------------|-------|-----------------------|--------|---------|---------|-------|
|                                                 | Method       | Value | Mean (%)              | SD (%) | LRL (%) | URL (%) |       |
| <b>Volume</b>                                   |              |       |                       |        |         |         |       |
| AV                                              | N/A          |       | -0.4                  | 10.5   | -21.0   | 20.3    | 0.997 |
| <b>Shape descriptors</b>                        |              |       |                       |        |         |         |       |
| Sphericity                                      | N/A          |       | 0.3                   | 10.0   | -19.4   | 20.0    | 0.946 |
| Irregularity                                    |              |       | 1.3                   | 3.3    | -5.2    | 7.7     | 0.948 |
| 3D surface                                      |              |       | -0.6                  | 11.6   | -23.4   | 22.2    | 0.988 |
| Major axis                                      |              |       | 3.8                   | 18.4   | -32.3   | 39.9    | 0.972 |
| <b>1<sup>st</sup> order metrics (histogram)</b> |              |       |                       |        |         |         |       |
| Maximum                                         | N/A          |       | 4.7                   | 38.6   | -70.9   | 80.3    | 0.539 |
| Mean                                            |              |       | -4.2                  | 43.6   | -89.7   | 81.3    | 0.865 |
| Standard deviation                              |              |       | -0.1                  | 12.0   | -23.7   | 23.5    | 0.866 |
| Skewness                                        |              |       | 11.1                  | 202.2  | -385.2  | 407.4   | 0.213 |
| Kurtosis                                        |              |       | 4.8                   | 37.4   | -68.6   | 78.1    | 0.034 |
| Energy                                          |              |       | 0.6                   | 12.3   | -23.5   | 24.7    | 0.915 |
| Entropy <sub>HIST</sub>                         |              |       | -0.1                  | 2.5    | -5.1    | 4.8     | 0.914 |
| CH <sub>AUC</sub>                               |              |       | 0.7                   | 9.1    | -17.0   | 18.5    | 0.851 |
| <b>2<sup>nd</sup> order metrics</b>             |              |       |                       |        |         |         |       |
| <b>GLCM</b>                                     |              |       |                       |        |         |         |       |
| ASM                                             | B            | 8     | 5.8                   | 45.2   | -82.7   | 94.4    | 0.543 |
|                                                 |              | 16    | 7.7                   | 52.4   | -95.1   | 110.5   | 0.356 |
|                                                 |              | 32    | 7.8                   | 54.2   | -98.4   | 114.0   | 0.219 |
|                                                 |              | 64    | 7.6                   | 54.3   | -98.7   | 114.0   | 0.159 |
|                                                 |              | 128   | 8.1                   | 52.0   | -93.8   | 110.0   | 0.163 |
|                                                 | W            | 10    | 1.9                   | 24.3   | -45.7   | 49.4    | 0.921 |
| IDM                                             | B            | 8     | 1.7                   | 10.8   | -19.4   | 22.9    | 0.823 |
|                                                 |              | 16    | 1.9                   | 17.5   | -31.3   | 37.2    | 0.800 |
|                                                 |              | 32    | 3.8                   | 23.4   | -42.0   | 49.6    | 0.757 |
|                                                 |              | 64    | 4.5                   | 27.6   | -49.6   | 58.5    | 0.689 |

|                          |   |     |      |      |        |      |       |
|--------------------------|---|-----|------|------|--------|------|-------|
|                          |   | 128 | 5.0  | 29.9 | -53.7  | 63.7 | 0.623 |
|                          | W | 10  | 1.3  | 8.2  | -14.9  | 17.4 | 0.951 |
| Entropy <sub>GLCM</sub>  | B | 8   | -4.9 | 31.8 | -67.3  | 57.4 | 0.791 |
|                          |   | 16  | -3.4 | 21.6 | -45.6  | 38.9 | 0.777 |
|                          |   | 32  | -2.5 | 15.5 | -32.9  | 27.9 | 0.763 |
|                          |   | 64  | -1.9 | 12.0 | -25.4  | 21.6 | 0.742 |
|                          |   | 128 | -1.5 | 9.4  | -19.9  | 16.8 | 0.713 |
|                          | W | 10  | -0.4 | 5.2  | -10.6  | 9.9  | 0.934 |
| Correlation              | B | 8   | 3.0  | 24.6 | -45.2  | 51.3 | 0.829 |
|                          |   | 16  | 3.0  | 24.0 | -44.2  | 50.1 | 0.840 |
|                          |   | 32  | 3.4  | 24.2 | -44.0  | 50.7 | 0.845 |
|                          |   | 64  | 3.5  | 24.1 | -43.8  | 50.7 | 0.847 |
|                          |   | 128 | 3.6  | 24.2 | -43.9  | 51.0 | 0.848 |
|                          | W | 10  | 3.5  | 24.3 | -44.1  | 51.1 | 0.842 |
| ID                       | B | 8   | 1.5  | 9.2  | -16.6  | 19.5 | 0.811 |
|                          |   | 16  | 2.2  | 13.0 | -23.3  | 27.7 | 0.795 |
|                          |   | 32  | 2.8  | 16.4 | -29.4  | 34.9 | 0.770 |
|                          |   | 64  | 3.2  | 19.4 | -34.7  | 41.2 | 0.738 |
|                          |   | 128 | 3.7  | 21.7 | -38.8  | 46.2 | 0.708 |
|                          | W | 10  | 0.9  | 5.6  | -10.2  | 11.9 | 0.951 |
| Dissimilarity            | B | 8   | -6.7 | 37.5 | -80.1  | 66.8 | 0.856 |
|                          |   | 16  | -5.9 | 33.2 | -71.1  | 59.2 | 0.861 |
|                          |   | 32  | -5.7 | 32.2 | -68.8  | 57.3 | 0.863 |
|                          |   | 64  | -5.6 | 32.1 | -68.6  | 57.3 | 0.863 |
|                          |   | 128 | -5.7 | 32.2 | -68.8  | 57.4 | 0.863 |
|                          | W | 10  | -1.7 | 10.9 | -23.0  | 19.6 | 0.949 |
| Contrast <sub>GLCM</sub> | B | 8   | -9.0 | 48.1 | -103.1 | 85.2 | 0.889 |
|                          |   | 16  | -8.9 | 52.2 | -111.1 | 93.4 | 0.887 |
|                          |   | 32  | -9.2 | 53.9 | -114.8 | 96.4 | 0.889 |
|                          |   | 64  | -9.2 | 54.4 | -115.9 | 97.5 | 0.889 |
|                          |   | 128 | -9.3 | 54.7 | -116.5 | 97.9 | 0.889 |
|                          | W | 10  | -2.8 | 20.6 | -43.2  | 37.5 | 0.937 |
| SOSV                     | B | 8   | -6.0 | 46.2 | -96.6  | 84.7 | 0.787 |
|                          |   | 16  | -6.0 | 49.7 | -103.4 | 91.4 | 0.791 |
|                          |   | 32  | -6.2 | 51.9 | -108.0 | 95.6 | 0.791 |
|                          |   | 64  | -6.1 | 53.0 | -109.9 | 97.7 | 0.791 |
|                          |   | 128 | -6.2 | 53.4 | -110.9 | 98.6 | 0.791 |
|                          | W | 10  | 0.1  | 1.8  | -3.4   | 3.6  | 0.916 |
| SAVE                     | B | 8   | -3.4 | 25.4 | -53.3  | 46.5 | 0.760 |
|                          |   | 16  | -3.5 | 27.7 | -57.7  | 50.8 | 0.765 |
|                          |   | 32  | -3.7 | 29.5 | -61.5  | 54.1 | 0.764 |
|                          |   | 64  | -3.7 | 30.3 | -63.1  | 55.7 | 0.763 |
|                          |   | 128 | -3.7 | 30.7 | -63.9  | 56.4 | 0.764 |

|                 |   |     |      |      |        |       |       |
|-----------------|---|-----|------|------|--------|-------|-------|
|                 | W | 10  | 0.0  | 1.1  | -2.2   | 2.3   | 0.918 |
| SVAR            | B | 8   | -7.3 | 49.8 | -104.8 | 90.2  | 0.877 |
|                 |   | 16  | -6.8 | 52.3 | -109.4 | 95.7  | 0.877 |
|                 |   | 32  | -6.9 | 53.1 | -111.0 | 97.2  | 0.878 |
|                 |   | 64  | -6.9 | 53.4 | -111.5 | 97.7  | 0.878 |
|                 |   | 128 | -7.0 | 53.5 | -111.9 | 98.0  | 0.878 |
|                 | W | 10  | 0.9  | 5.6  | -10.1  | 11.9  | 0.829 |
| SENT            | B | 8   | -4.2 | 28.7 | -60.4  | 52.0  | 0.743 |
|                 |   | 16  | -2.6 | 17.8 | -37.6  | 32.3  | 0.747 |
|                 |   | 32  | -1.8 | 12.6 | -26.4  | 22.8  | 0.752 |
|                 |   | 64  | -1.4 | 10.0 | -21.0  | 18.2  | 0.749 |
|                 |   | 128 | -1.2 | 8.3  | -17.5  | 15.1  | 0.745 |
|                 | W | 10  | 0.1  | 0.4  | -0.8   | 0.9   | 0.865 |
| DVAR            | B | 8   | -8.3 | 40.3 | -87.3  | 70.8  | 0.886 |
|                 |   | 16  | -8.4 | 47.7 | -102.0 | 85.2  | 0.888 |
|                 |   | 32  | -9.1 | 51.8 | -110.6 | 92.5  | 0.889 |
|                 |   | 64  | -9.2 | 53.1 | -113.3 | 94.9  | 0.889 |
|                 |   | 128 | -9.3 | 53.5 | -114.1 | 95.5  | 0.890 |
|                 | W | 10  | -1.4 | 9.8  | -20.6  | 17.9  | 0.820 |
| DENT            | B | 8   | -5.1 | 27.8 | -59.6  | 49.4  | 0.803 |
|                 |   | 16  | -3.4 | 19.3 | -41.3  | 34.4  | 0.812 |
|                 |   | 32  | -2.8 | 15.7 | -33.6  | 28.0  | 0.803 |
|                 |   | 64  | -2.3 | 13.1 | -28.0  | 23.4  | 0.791 |
|                 |   | 128 | -2.0 | 10.9 | -23.3  | 19.4  | 0.783 |
|                 | W | 10  | -0.3 | 1.9  | -4.1   | 3.5   | 0.822 |
| IC              | B | 8   | 8.4  | 42.4 | -74.8  | 91.5  | 0.797 |
|                 |   | 16  | 8.9  | 41.1 | -71.8  | 89.5  | 0.848 |
|                 |   | 32  | 8.7  | 39.0 | -67.7  | 85.0  | 0.841 |
|                 |   | 64  | 7.1  | 32.6 | -56.8  | 71.1  | 0.880 |
|                 |   | 128 | 3.3  | 26.2 | -48.2  | 54.7  | 0.957 |
|                 | W | 10  | 6.7  | 34.8 | -61.5  | 74.8  | 0.846 |
| Autocorrelation | B | 8   | -5.8 | 46.2 | -96.3  | 84.7  | 0.784 |
|                 |   | 16  | -5.8 | 49.8 | -103.3 | 91.7  | 0.787 |
|                 |   | 32  | -6.0 | 52.0 | -108.0 | 96.0  | 0.787 |
|                 |   | 64  | -5.9 | 53.1 | -110.0 | 98.3  | 0.787 |
|                 |   | 128 | -5.9 | 53.6 | -111.1 | 99.2  | 0.787 |
|                 | W | 10  | 0.4  | 3.3  | -6.1   | 6.8   | 0.856 |
| CP              | B | 8   | -8.0 | 72.5 | -150.1 | 134.1 | 0.853 |
|                 |   | 16  | -7.6 | 75.4 | -155.2 | 140.1 | 0.849 |
|                 |   | 32  | -7.8 | 75.9 | -156.6 | 141.1 | 0.847 |
|                 |   | 64  | -7.8 | 76.1 | -156.9 | 141.3 | 0.847 |
|                 |   | 128 | -7.8 | 76.2 | -157.1 | 141.5 | 0.847 |
|                 | W | 10  | 1.4  | 7.8  | -13.8  | 16.7  | 0.856 |

|                                     |   |     |      |      |        |       |        |
|-------------------------------------|---|-----|------|------|--------|-------|--------|
| MaxProba                            | B | 8   | 3.7  | 40.3 | -75.2  | 82.6  | 0.677  |
|                                     |   | 16  | 7.7  | 49.9 | -90.1  | 105.6 | 0.557  |
|                                     |   | 32  | 7.9  | 50.8 | -91.7  | 107.5 | 0.330  |
|                                     |   | 64  | 3.7  | 52.8 | -99.7  | 107.2 | 0.173  |
|                                     |   | 128 | 4.2  | 52.4 | -98.4  | 106.8 | 0.255  |
|                                     | W | 10  | 1.5  | 21.1 | -39.9  | 42.8  | 0.879  |
| <b>NGTDM</b>                        |   |     |      |      |        |       |        |
| Coarseness                          | B | 8   | 0.5  | 31.9 | -62.0  | 63.0  | -      |
|                                     |   | 16  | -2.3 | 20.9 | -43.2  | 38.6  | 0.9883 |
|                                     |   | 32  | -2.8 | 20.1 | -42.1  | 36.5  | 0.9888 |
|                                     |   | 64  | -2.9 | 19.8 | -41.8  | 36.0  | 0.9861 |
|                                     |   | 128 | -2.7 | 20.8 | -43.5  | 38.1  | 0.977  |
|                                     | W | 10  | -2.7 | 19.5 | -41.0  | 35.6  | 0.9743 |
| Contrast <sub>NGTDM</sub>           | B | 8   | -9.9 | 64.9 | -137.1 | 117.2 | 0.8199 |
|                                     |   | 16  | -8.3 | 63.1 | -132.1 | 115.4 | 0.8366 |
|                                     |   | 32  | -5.9 | 60.2 | -123.9 | 112.2 | 0.8419 |
|                                     |   | 64  | -4.5 | 56.9 | -116.0 | 107.1 | 0.8476 |
|                                     |   | 128 | -5.2 | 54.3 | -111.6 | 101.1 | 0.8424 |
|                                     | W | 10  | 1.6  | 18.3 | -34.2  | 37.5  | 0.8823 |
| Busyness                            | B | 8   | 0.0  | 29.7 | -58.2  | 58.1  | 0.9803 |
|                                     |   | 16  | 3.4  | 22.4 | -40.4  | 47.3  | 0.9701 |
|                                     |   | 32  | 4.0  | 25.0 | -45.1  | 53.1  | 0.949  |
|                                     |   | 64  | 4.2  | 26.0 | -46.8  | 55.2  | 0.9378 |
|                                     |   | 128 | 4.1  | 26.1 | -47.0  | 55.1  | 0.9335 |
|                                     | W | 10  | 1.6  | 18.0 | -33.6  | 36.8  | 0.9937 |
| Complexity                          | B | 8   | -3.0 | 25.3 | -52.6  | 46.5  | 0.6031 |
|                                     |   | 16  | 0.0  | 12.3 | -24.2  | 24.2  | 0.8403 |
|                                     |   | 32  | 0.5  | 13.4 | -25.8  | 26.7  | 0.8382 |
|                                     |   | 64  | 0.5  | 14.3 | -27.6  | 28.5  | 0.8148 |
|                                     |   | 128 | 0.3  | 14.7 | -28.5  | 29.1  | 0.7823 |
|                                     | W | 10  | -0.5 | 12.3 | -24.5  | 23.5  | 0.7293 |
| TS                                  | B | 8   | -3.5 | 36.8 | -75.6  | 68.5  | 0.9864 |
|                                     |   | 16  | -2.9 | 33.8 | -69.2  | 63.4  | 0.9877 |
|                                     |   | 32  | -2.9 | 34.1 | -69.8  | 63.9  | 0.9876 |
|                                     |   | 64  | -2.9 | 34.3 | -70.1  | 64.3  | 0.9871 |
|                                     |   | 128 | -3.0 | 34.3 | -70.2  | 64.3  | 0.9871 |
|                                     | W | 10  | 1.7  | 17.9 | -33.3  | 36.8  | 0.9931 |
| <b>3<sup>rd</sup> order metrics</b> |   |     |      |      |        |       |        |
| <b>GLZSM</b>                        |   |     |      |      |        |       |        |
| SZSE                                | B | 8   | -0.5 | 3.9  | -8.3   | 7.2   | 0.876  |
|                                     |   | 16  | -0.2 | 4.0  | -8.0   | 7.6   | 0.842  |
|                                     |   | 32  | -0.4 | 5.1  | -10.5  | 9.6   | 0.845  |
|                                     |   | 64  | -0.6 | 4.8  | -10.1  | 8.9   | 0.784  |

|       |   |     |      |       |        |       |       |
|-------|---|-----|------|-------|--------|-------|-------|
|       |   | 128 | -0.6 | 3.6   | -7.7   | 6.5   | 0.709 |
|       | W | 10  | -0.5 | 2.6   | -5.6   | 4.6   | 0.910 |
| LZSE  | B | 8   | 12.5 | 80.2  | -144.8 | 169.8 | 0.044 |
|       |   | 16  | 8.0  | 112.7 | -213.0 | 228.9 | 0.050 |
|       |   | 32  | 6.5  | 79.9  | -150.2 | 163.2 | -     |
|       |   | 64  | 7.1  | 41.2  | -73.7  | 88.0  | -     |
|       |   | 128 | 4.3  | 26.0  | -46.6  | 55.2  | 0.013 |
|       | W | 10  | 0.8  | 68.7  | -133.8 | 135.5 | 0.323 |
| ZSNU  | B | 8   | -2.4 | 35.8  | -72.6  | 67.9  | 0.973 |
|       |   | 16  | 0.3  | 24.5  | -47.8  | 48.3  | 0.997 |
|       |   | 32  | 1.8  | 22.9  | -43.1  | 46.6  | 0.989 |
|       |   | 64  | 3.0  | 26.9  | -49.8  | 55.7  | 0.976 |
|       |   | 128 | 5.2  | 30.2  | -54.1  | 64.5  | 0.964 |
|       | W | 10  | 1.9  | 19.1  | -35.5  | 39.3  | 0.994 |
| GLNU  | B | 8   | -5.9 | 50.3  | -104.4 | 92.6  | 0.919 |
|       |   | 16  | -3.1 | 46.0  | -93.2  | 87.1  | 0.968 |
|       |   | 32  | -2.2 | 38.3  | -77.2  | 72.8  | 0.989 |
|       |   | 64  | -1.9 | 30.2  | -61.0  | 57.3  | 0.993 |
|       |   | 128 | -0.6 | 23.9  | -47.5  | 46.2  | 0.994 |
|       | W | 10  | 0.4  | 20.7  | -40.3  | 41.0  | 0.998 |
| ZSP   | B | 8   | -7.4 | 46.8  | -99.2  | 84.4  | 0.911 |
|       |   | 16  | -5.2 | 40.8  | -85.2  | 74.8  | 0.859 |
|       |   | 32  | -3.7 | 28.1  | -58.7  | 51.3  | 0.785 |
|       |   | 64  | -2.8 | 17.4  | -36.9  | 31.3  | 0.673 |
|       |   | 128 | -1.5 | 9.0   | -19.0  | 16.1  | 0.608 |
|       | W | 10  | -0.9 | 11.9  | -24.2  | 22.4  | 0.949 |
| LGLZE | B | 8   | 4.4  | 30.9  | -56.2  | 65.1  | 0.677 |
|       |   | 16  | 4.9  | 46.9  | -86.9  | 96.7  | 0.494 |
|       |   | 32  | 5.0  | 47.5  | -88.1  | 98.1  | 0.384 |
|       |   | 64  | 1.7  | 46.2  | -89.0  | 92.3  | 0.480 |
|       |   | 128 | 1.0  | 48.9  | -94.8  | 96.9  | 0.673 |
|       | W | 10  | -2.3 | 19.6  | -40.6  | 36.1  | 0.926 |
| HGLZE | B | 8   | -3.6 | 35.3  | -72.9  | 65.6  | 0.715 |
|       |   | 16  | -5.6 | 47.6  | -98.8  | 87.6  | 0.764 |
|       |   | 32  | -6.2 | 51.6  | -107.3 | 94.8  | 0.772 |
|       |   | 64  | -6.3 | 52.8  | -109.8 | 97.3  | 0.774 |
|       |   | 128 | -6.3 | 53.3  | -110.8 | 98.3  | 0.776 |
|       | W | 10  | 1.1  | 16.3  | -30.9  | 33.0  | 0.827 |
| SZLGE | B | 8   | 2.4  | 28.6  | -53.7  | 58.5  | 0.635 |
|       |   | 16  | 4.4  | 42.7  | -79.4  | 88.1  | 0.552 |
|       |   | 32  | 4.9  | 44.4  | -82.1  | 91.8  | 0.443 |
|       |   | 64  | 1.4  | 44.6  | -86.1  | 88.8  | 0.533 |
|       |   | 128 | 1.1  | 48.1  | -93.1  | 95.4  | 0.704 |



|       |   |     |      |       |        |       |       |
|-------|---|-----|------|-------|--------|-------|-------|
|       | W | 10  | -2.7 | 18.9  | -39.8  | 34.4  | 0.936 |
| SZHGE | B | 8   | -3.1 | 35.5  | -72.7  | 66.5  | 0.727 |
|       |   | 16  | -5.3 | 48.2  | -99.7  | 89.1  | 0.767 |
|       |   | 32  | -6.4 | 54.1  | -112.5 | 99.6  | 0.781 |
|       |   | 64  | -6.7 | 55.4  | -115.3 | 102.0 | 0.780 |
|       |   | 128 | -6.5 | 54.9  | -114.1 | 101.0 | 0.779 |
|       | W | 10  | 0.7  | 17.6  | -33.7  | 35.2  | 0.833 |
| LZLGE | B | 8   | 14.1 | 96.5  | -175.0 | 203.1 | -     |
|       |   | 16  | 10.7 | 115.3 | -215.2 | 236.6 | -     |
|       |   | 32  | 6.0  | 87.4  | -165.2 | 177.3 | -     |
|       |   | 64  | 3.6  | 59.6  | -113.3 | 120.5 | -     |
|       |   | 128 | 1.8  | 55.4  | -106.8 | 110.4 | -     |
|       | W | 10  | -0.3 | 61.7  | -121.3 | 120.7 | 0.330 |
| LZHGE | B | 8   | 8.4  | 60.6  | -110.4 | 127.1 | 0.588 |
|       |   | 16  | 5.9  | 104.6 | -199.1 | 210.8 | 0.629 |
|       |   | 32  | 3.6  | 70.6  | -134.8 | 141.9 | -     |
|       |   | 64  | 3.8  | 36.4  | -67.6  | 75.2  | -     |
|       |   | 128 | -1.3 | 42.0  | -83.7  | 81.1  | 0.753 |
|       | W | 10  | 0.8  | 71.0  | -38.3  | 139.8 | 0.332 |

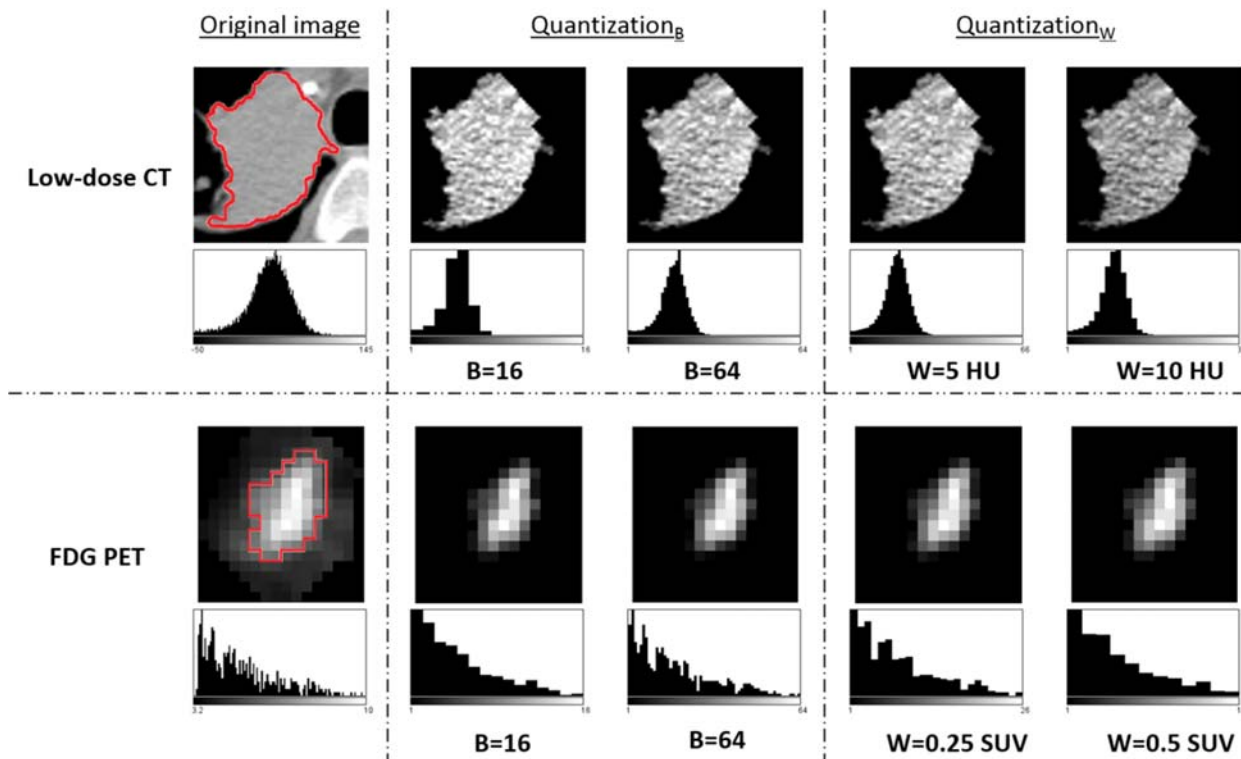

SUPPLEMENTAL FIGURE 1: The different quantization approaches with different values for B (number of bins) or W (bin width) and corresponding histograms in low-dose CT and FDG PET components. Red contours correspond to the tumor delineation.

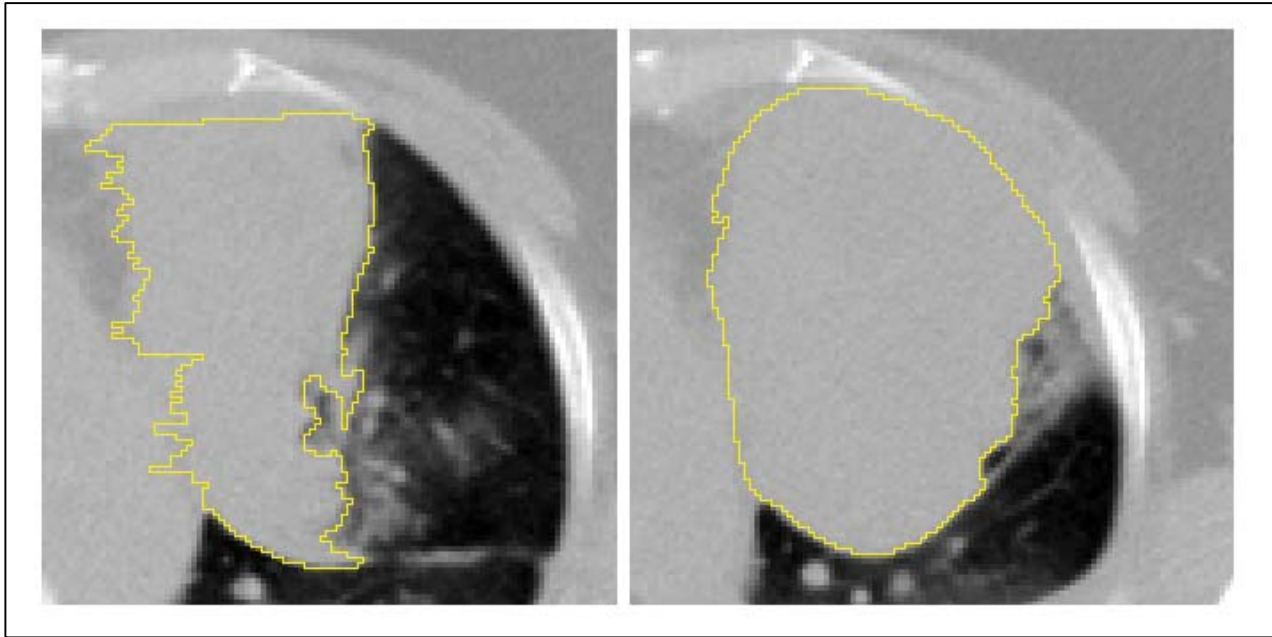

SUPPLEMENTAL FIGURE 2: patient with clearly nonrepeatable volume delineation

## REFERENCES

1. Materka A, Strzelecki M. *Texture Analysis Methods: A Review*. Brussels, Belgium: Institute of Electronics, Lodz University of Technology; 1998. Technical report no. COST B11.
2. Haralick RM, Shanmugam K, Dinstein I. Textural features for image classification. *IEEE Trans Syst Man Cybern*. 1973;SMC-3:610–621.
3. Soh L-K, Tsatsoulis C. Texture analysis of SAR sea ice imagery using gray level co-occurrence matrices. *IEEE Trans Geosci Remote Sens*. 1999;37:780–795.
4. Clausi DA. An analysis of co-occurrence texture statistics as a function of gray level quantization. *Can J Remote Sens*. 2002;28:45–62.
5. Bharati MH, Liu JJ, MacGregor JF. Image texture analysis: methods and comparisons. *Chemom Intell Lab Syst*. 2004;72:57–71.
6. Amadasun M, King R. Textural features corresponding to textural properties. *IEEE Trans Syst Man Cybern*. 1989;19:1264–1274.
7. Tang X. Texture information in run-length matrices. *IEEE Trans Image Process*. 1998;7:1602–1609.
